# Supplementary material
Source: publisher figshare collection journal article supplement (https://tandf.figshare.com/ndownloader/files/21912315)
Supplement: Supplementary file 1 [file 21912315]

### Supplemental Digital Appendix 1: Clinical case scenarios used for OSTE

|             | Physical<br>examination                                 | Technical<br>procedure                                    | Communication                                          | Interprofessional<br>collaboration                                             | Professionalism                                                                               | Clinical<br>reasoning                                                                                                                                    |
|-------------|---------------------------------------------------------|-----------------------------------------------------------|--------------------------------------------------------|--------------------------------------------------------------------------------|-----------------------------------------------------------------------------------------------|----------------------------------------------------------------------------------------------------------------------------------------------------------|
| Gynaecology | Vaginal examination and Pap test in a 25-year-old woman | Delivery with shoulder dystocia in a 32-year-old woman 1G | Breaking bad news (miscarriage) to a 38-year-old woman | Vaginal bleeding during delivery – the resident does not listen to the midwife | 1. Written notes about a consultation of a woman with PID (inappropriate judgmental attitude) | 1. 42-year-old women, G1, 28 weeks, presenting with epigastric pain<br>2. 25-year-old woman presenting with vaginal bleeding and a delay in menstruation |
| Paediatrics | Psychomotor evaluation of a 4-                          | Lumbar puncture in 2-month-old child presenting a         | Encounter with a teenager at her mother's request      | Nurse-resident phone discussion about fever                                    | 1. Admission notes about an 8-month-old child presenting                                      | 1. 2-year-old child presenting with a                                                                                                                    |

|            |                                                                                   |                               |                                                                        |                                                                                                                                                               |                                                                                                                                                   |                                                                                                                                                                  |
|------------|-----------------------------------------------------------------------------------|-------------------------------|------------------------------------------------------------------------|---------------------------------------------------------------------------------------------------------------------------------------------------------------|---------------------------------------------------------------------------------------------------------------------------------------------------|------------------------------------------------------------------------------------------------------------------------------------------------------------------|
|            | year-old<br>boy                                                                   | fever of<br>unclear<br>origin |                                                                        | in renal<br>transplanted<br>child – the<br>resident does<br>not listen to<br>the nurse                                                                        | with fever<br>and not<br>immunized<br>according to<br>parents’ will<br>(inappropriate<br>judgmental<br>attitude)                                  | febrile<br>seizure<br>2. 8-month-<br>old baby<br>presenting a<br>fever of<br>unclear<br>origin                                                                   |
| Psychiatry | Psychiatric status of<br>a 41 year<br>old patient<br>with<br>persecution delirium | --                            | Management of a drug<br>addicted<br>patient<br>asking for<br>methadone | Interprofessional<br>discharge<br>meeting<br>(psychiatric<br>patient with<br>diabetes –<br>the resident<br>does not<br>listen to the<br>other<br>participants | 1. Admission notes of<br>a 37-year-<br>old<br>borderline<br>woman<br>admitted<br>for suicide<br>attempt<br>(inappropriate<br>judgmental attitude) | 1. 45-year-<br>old woman<br>present a<br>first episode<br>of<br>depression<br>2. 26-year-<br>old woman<br>presenting<br>with a first<br>maniac<br>decompensation |

|                   |                                                                                          |                                                                                                      |                                                                  |                                                                                                                                 |                                                                                                    |                                                                                                                                           |
|-------------------|------------------------------------------------------------------------------------------|------------------------------------------------------------------------------------------------------|------------------------------------------------------------------|---------------------------------------------------------------------------------------------------------------------------------|----------------------------------------------------------------------------------------------------|-------------------------------------------------------------------------------------------------------------------------------------------|
| Primary Care      | Shoulder examination in a 51-year-old woman presenting with subacute right shoulder pain | Knee puncture in a 65-year-old female patient presenting with exacerbated osteoarthritis of the knee | Error disclosure (rectoscopy performed instead of a colonoscopy) | Interprofessional meeting (diabetic patient with psychiatric problems) – the resident does not listen to the other participants | 1. Consultation notes with lacunar information                                                     | 1. 45-year-old woman presenting a chronic cough<br>2. 55-year-old man presenting with subacute epigastric pain                            |
| Internal Medicine | Abdominal examination in a 58-year-old woman hospitalized for chronic diarrhea and       | Ascites tap in a 68-year-old female patient with decompensated cirrhosis                             | Breaking bad news (lung cancer)                                  | Acute hypotension in a female patient hospitalised for abdominal pain – the resident does not listen to the nurse               | 1. Important physical examination elements omitted by the resident who did not examine the patient | 1. 68-year-old woman presenting with shortness of breath<br>2. 72-year-old man admitting for heart insufficiency, developing an acute and |

1  
2  
3  
4  
5  
6  
7  
8  
9  
10  
11  
12  
13  
14  
15  
16  
17  
18  
19  
20  
21  
22  
23  
24  
25  
26  
27  
28  
29  
30  
31  
32  
33  
34  
35  
36  
37  
38  
39  
40  
41  
42  
43  
44  
45  
46  
47  
48  
49  
50  
51  
52  
53  
54  
55  
56  
57  
58  
59  
60

|  |        |  |  |  |  |         |
|--|--------|--|--|--|--|---------|
|  | weight |  |  |  |  | swollen |
|  | loss   |  |  |  |  | ankle   |

For Peer-Review Only

**Supplemental Digital Appendix 2. Participant Characteristics (N=127)**

| <b>Characteristic</b>                         | <b>Guided Self-Reflection Format<br/>(n= 60)</b> | <b>Coaching Format<br/>(n=67)</b> | <b><i>P</i> Value</b> |
|-----------------------------------------------|--------------------------------------------------|-----------------------------------|-----------------------|
| <b>Median Age</b>                             | 37                                               | 38                                | .06                   |
| <b>Gender, n (%)</b>                          |                                                  |                                   | 0.42                  |
| Female                                        | 40 (66.7)                                        | 40 (59.7)                         |                       |
| Male                                          | 20 (33.3)                                        | 27 (40.3)                         |                       |
| <b>Department, n (%)</b>                      |                                                  |                                   | .94                   |
| Gynecology and Obstetrics                     | 10 (16.7)                                        | 10 (14.9)                         |                       |
| Pediatrics                                    | 10 (16.7)                                        | 14 (20.9)                         |                       |
| Psychiatry                                    | 9 (15.0)                                         | 12 (17.9)                         |                       |
| Family Medicine                               | 14 (23.3)                                        | 15 (22.4)                         |                       |
| Internal Medicine                             | 17 (28.3)                                        | 16 (23.8)                         |                       |
| <b>Median years of supervision experience</b> | 4                                                | 5                                 | .30                   |
